# Supplementary material
Source: PubMed Central journal article supplement (PMC11477843)
Supplement: ajcr0014-4665-f5.pdf [file ajcr0014-4665-f5.pdf]

## HPV integrations in cervical cancer

**Table S1.** Summary of 13 cancer samples analyzed in this study: HPV viral status and clinical information

| Sample name | HPV status                 | Sequencing depth | No. of validated integration sites on the basis of different reads |     |   |   |     | Pathology          |
|-------------|----------------------------|------------------|--------------------------------------------------------------------|-----|---|---|-----|--------------------|
|             |                            |                  | Total                                                              | > 3 | 3 | 2 | 1   |                    |
| S1-T        | HPV16, HPV82               | 60X              | 46                                                                 | 2   | 1 | 3 | 40  | cervical carcinoma |
| S2-T        | HPV16, HPV31, HPV82        | 60X              | 37                                                                 | 5   | - | 2 | 30  | cervical carcinoma |
| S3-T        | HPV16, HPV82               | 60X              | 396                                                                | 18  | 2 | 5 | 371 | cervical carcinoma |
| S4-T        | HPV16, HPV31, HPV45, HPV82 | 60X              | 85                                                                 | 1   | 1 | 6 | 77  | cervical carcinoma |
| S5-T        | HPV82                      | 60X              | 28                                                                 | 2   | 1 | 1 | 24  | cervical carcinoma |
| S6-T        | HPV16, HPV82               | 60X              | 23                                                                 | -   | 1 | 2 | 20  | cervical carcinoma |
| S7-T        | HPV16, HPV82               | 60X              | 32                                                                 | -   | - | 1 | 31  | cervical carcinoma |
| S8-T        | HPV16, HPV82               | 60X              | 104                                                                | 2   | - | - | 102 | cervical carcinoma |
| S9-T        | HPV16, HPV82               | 60X              | 26                                                                 | -   | 1 | 4 | 21  | cervical carcinoma |
| S10-T       | HPV82                      | 60X              | 15                                                                 | -   | 1 | 1 | 13  | cervical carcinoma |
| S11-T       | HPV82                      | 60X              | 21                                                                 | 1   | 1 | - | 19  | cervical carcinoma |
| S12-T       | HPV58, HPV82               | 60X              | 30                                                                 | 4   | - | 1 | 25  | cervical carcinoma |
| S13-T       | HPV16, HPV82               | 60X              | 27                                                                 | 3   | - | 3 | 21  | cervical carcinoma |

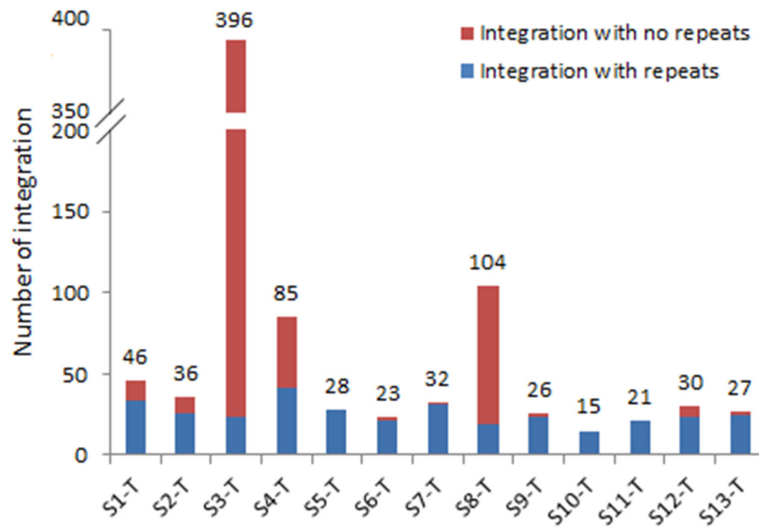

**Figure S1.** Distribution of integration in 13 samples.

## HPV integrations in cervical cancer

**Table S2.** Production of whole-genome paired-end sequencing data

| Sample ID | Read length | Insert size | Reads PF*, M | Yield**, Gb | ≥ Q30 (%)** | # of HPV integrations |
|-----------|-------------|-------------|--------------|-------------|-------------|-----------------------|
| S1-T      | 150         | 350         | 1820.68      | 273.1       | 91.7        | 46                    |
| S2-T      | 150         | 350         | 1626.75      | 244.01      | 91.7        | 37                    |
| S3-T      | 150         | 350         | 1821.71      | 273.26      | 92.38       | 396                   |
| S4-T      | 150         | 350         | 1695.22      | 254.28      | 92.27       | 85                    |
| S5-T      | 150         | 350         | 1538.42      | 230.76      | 95.53       | 28                    |
| S6-T      | 150         | 350         | 1580.1       | 237.01      | 95.32       | 23                    |
| S7-T      | 150         | 350         | 1590.99      | 238.65      | 95.42       | 32                    |
| S8-T      | 150         | 350         | 1593.53      | 239.03      | 95.34       | 103                   |
| S9-T      | 150         | 350         | 1589.14      | 238.37      | 95.02       | 26                    |
| S10-T     | 150         | 350         | 1571.88      | 235.78      | 94.93       | 15                    |
| S11-T     | 150         | 350         | 1354.19      | 203.13      | 95.37       | 21                    |
| S12-T     | 150         | 350         | 1543.42      | 231.51      | 94.94       | 30                    |
| S13-T     | 150         | 350         | 1743.54      | 261.53      | 94.94       | 27                    |

1. Data separated by semicolon are corresponding to No. 1 end and No. 2 end of PE reads, respectively.

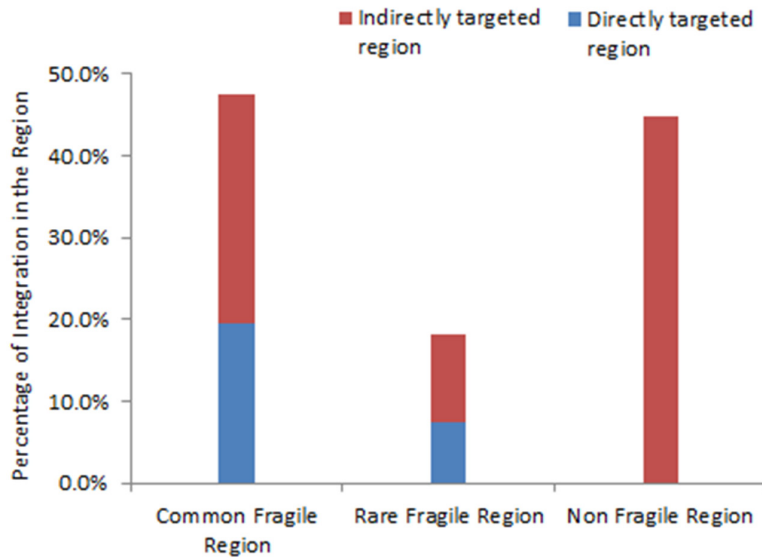

**Figure S2.** Distribution of integrations in human fragile regions.

# HPV integrations in cervical cancer

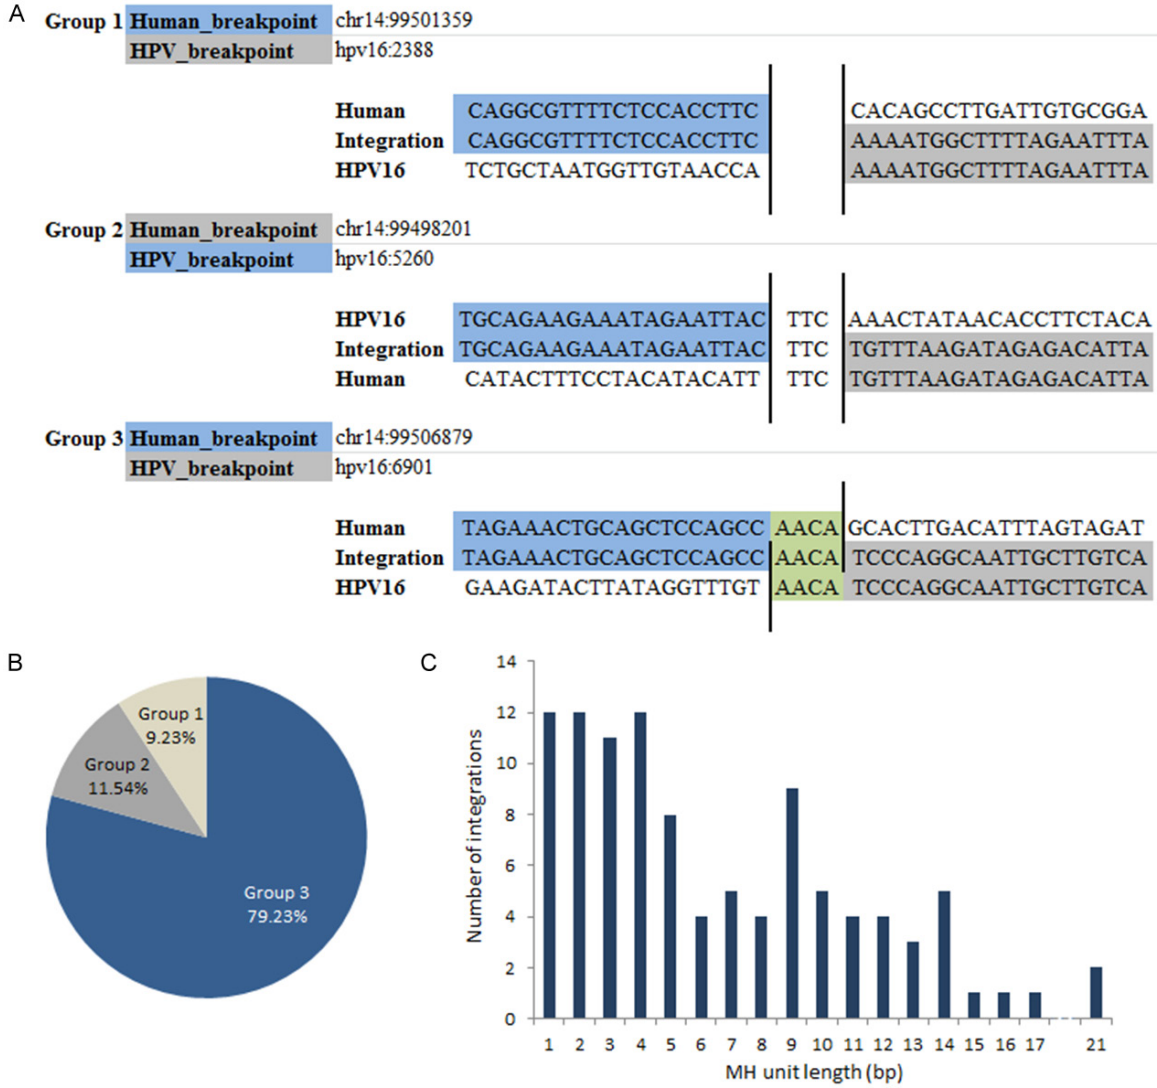

**Figure S3.** Sequence alignment around the integration site between the human genome and HPV genome.

## HPV integrations in cervical cancer

**Table S6.** Viral breakpoints collection

| ORF | Breakpoint | Raw Count | Total Count | Band leghth | Density'-score |
|-----|------------|-----------|-------------|-------------|----------------|
| L1  | L1         | 96        | 109         | 296         | 29.1133        |
|     | L2/L1      | 13        |             |             |                |
| E1  | E1         | 132       | 151         | 476         | 25.0800        |
|     | E1/E2      | 13        |             |             |                |
|     | E7/E1      | 6         |             |             |                |
| E5  | E5         | 21        | 27          | 251         | 8.5045         |
|     | E2/E5      | 5         |             |             |                |
|     | E5/L2      | 1         |             |             |                |
| E4  | E4         | 29        | 29          | 287         | 7.9886         |
| E2  | E2         | 44        | 91          | 1097        | 6.5583         |
|     | E1/E2      | 13        |             |             |                |
|     | E2/E5      | 5         |             |             |                |
|     | E4         | 29        |             |             |                |
| LCR | LCR        | 56        | 56          | 837         | 5.2896         |
| L2  | L2         | 83        | 97          | 1948        | 3.9368         |
|     | L2/L1      | 13        |             |             |                |
|     | E5/L2      | 1         |             |             |                |
| E7  | E7         | 14        | 25          | 1421        | 1.3909         |
|     | E7/E1      | 6         |             |             |                |
|     | E6/E7      | 5         |             |             |                |
| E6  | E6         | 18        | 23          | 1595        | 1.1401         |
|     | E6/E7      | 5         |             |             |                |

1. Raw count: N of intregation sites. 2. Density'-score: Total count/band leghth\*7906/100.

## HPV integrations in cervical cancer

**Table S9.** KEGG and GO pathways enriched by the ITGs

| Category         | Term                                                                         | Count | %           | P Value     | Genes                                                                                                                                                   | List Total | Pop Hits | Pop Total | Fold Enrichment | Bonferroni | Benjamini | FDR        |
|------------------|------------------------------------------------------------------------------|-------|-------------|-------------|---------------------------------------------------------------------------------------------------------------------------------------------------------|------------|----------|-----------|-----------------|------------|-----------|------------|
| GOTERM_MF_DIRECT | GO:0043565~sequence-specific DNA binding                                     | 4     | 2.105263158 | 0.729338219 | ENSG00000057935, ENSG00000197587, ENSG00000166949, ENSG00000069667                                                                                      | 119        | 519      | 16313     | 1.056524344     | 1          | 0.9999941 | 99.9999964 |
| GOTERM_BP_DIRECT | GO:0006955~immune response                                                   | 4     | 2.105263158 | 0.629988083 | ENSG00000166949, ENSG00000111536, ENSG00000111537, ENSG00000127318                                                                                      | 130        | 420      | 16787     | 1.22981685      | 1          | 1         | 99.9999685 |
| GOTERM_MF_DIRECT | GO:0004674~protein serine/threonine kinase activity                          | 4     | 2.105263158 | 0.515670228 | ENSG00000010219, ENSG00000127334, ENSG00000079277, ENSG00000070759                                                                                      | 119        | 377      | 16313     | 1.454472505     | 1          | 0.9999007 | 99.9926316 |
| GOTERM_MF_DIRECT | GO:0004674~protein serine/threonine kinase activity                          | 4     | 2.105263158 | 0.515670228 | ENSG00000010219, ENSG00000127334, ENSG00000079277, ENSG00000070759                                                                                      | 119        | 377      | 16313     | 1.454472505     | 1          | 0.9999007 | 99.9926316 |
| GOTERM_BP_DIRECT | GO:0006468~protein phosphorylation                                           | 5     | 2.631578947 | 0.467844366 | ENSG00000127334, ENSG00000106123, ENSG00000079277, ENSG00000070759, ENSG00000185974                                                                     | 130        | 457      | 16787     | 1.412809291     | 1          | 1         | 99.9925036 |
| GOTERM_MF_DIRECT | GO:0003700~transcription factor activity, sequence-specific DNA binding      | 9     | 4.736842105 | 0.394827961 | ENSG00000057935, ENSG00000197587, ENSG00000166949, ENSG00000128604, ENSG00000069667, ENSG00000188786, ENSG00000066827, ENSG00000061337, ENSG00000030419 | 119        | 962      | 16313     | 1.282490959     | 1          | 0.9994185 | 99.8628847 |
| GOTERM_MF_DIRECT | GO:0005125~cytokine activity                                                 | 3     | 1.578947368 | 0.364482994 | ENSG00000111536, ENSG00000111537, ENSG00000127318                                                                                                       | 119        | 176      | 16313     | 2.336659664     | 1          | 0.9994816 | 99.7393981 |
| GOTERM_MF_DIRECT | GO:0000977~RNA polymerase II regulatory region sequence-specific DNA binding | 4     | 2.105263158 | 0.187376422 | ENSG00000197587, ENSG00000166949, ENSG00000069667, ENSG00000066827                                                                                      | 119        | 206      | 16313     | 2.661825895     | 1          | 0.9978781 | 93.4344955 |
| KEGG_PATHWAY     | hsa04512:ECM-receptor interaction                                            | 3     | 1.578947368 | 0.143329244 | ENSG00000110799, ENSG00000134871, ENSG00000186340                                                                                                       | 54         | 87       | 6910      | 4.412515964     | 1          | 0.894787  | 83.5366551 |
| KEGG_PATHWAY     | hsa04151:PI3K-Akt signaling pathway                                          | 6     | 3.157894737 | 0.123304931 | ENSG00000080824, ENSG00000110799, ENSG00000134871, ENSG00000037280, ENSG00000186340, ENSG00000135930                                                    | 54         | 345      | 6910      | 2.225442834     | 0.99999997 | 0.9147976 | 78.4456174 |

## HPV integrations in cervical cancer

|                  |                                                              |   |             |             |                                                                                                                           |     |     |       |             |            |           |            |
|------------------|--------------------------------------------------------------|---|-------------|-------------|---------------------------------------------------------------------------------------------------------------------------|-----|-----|-------|-------------|------------|-----------|------------|
| GOTERM_MF_DIRECT | GO:0004672~protein kinase activity                           | 6 | 3.157894737 | 0.119180469 | ENSG00000010219,<br>ENSG000000106123,<br>ENSG000000183317,<br>ENSG000000079277,<br>ENSG000000070759,<br>ENSG000000185974  | 119 | 359 | 16313 | 2.291098055 | 1          | 0.9920963 | 81.0930112 |
| KEGG_PATHWAY     | hsa04060:Cytokine-cytokine receptor interaction              | 5 | 2.631578947 | 0.09893686  | ENSG000000111536,<br>ENSG000000111537,<br>ENSG000000124334,<br>ENSG000000037280,<br>ENSG000000127318                      | 54  | 230 | 6910  | 2.781803543 | 0.99999882 | 0.8971615 | 70.3254846 |
| GOTERM_CC_DIRECT | GO:0031012~extracellular matrix                              | 6 | 3.157894737 | 0.086093889 | ENSG000000080824,<br>ENSG000000182492,<br>ENSG000000110799,<br>ENSG000000134871,<br>ENSG000000197102,<br>ENSG000000186340 | 143 | 300 | 18202 | 2.545734266 | 0.99999993 | 0.9629321 | 67.1090251 |
| KEGG_PATHWAY     | hsa04510:Focal adhesion                                      | 5 | 2.631578947 | 0.07241287  | ENSG000000110799,<br>ENSG000000128591,<br>ENSG000000134871,<br>ENSG000000037280,<br>ENSG000000186340                      | 54  | 206 | 6910  | 3.105897159 | 0.9999471  | 0.9624604 | 58.3791417 |
| GOTERM_MF_DIRECT | GO:0004713~protein tyrosine kinase activity                  | 4 | 2.105263158 | 0.072032227 | ENSG000000080824,<br>ENSG00000010219,<br>ENSG000000127334,<br>ENSG000000070759                                            | 119 | 133 | 16313 | 4.122828079 | 1          | 0.9987105 | 62.5149376 |
| GOTERM_MF_DIRECT | GO:0004712~protein serine/threonine/tyrosine kinase activity | 3 | 1.578947368 | 0.018545096 | ENSG00000010219,<br>ENSG000000127334,<br>ENSG000000070759                                                                 | 119 | 29  | 16313 | 14.18110693 | 0.99324876 | 0.9932488 | 21.7840035 |
| GOTERM_BP_DIRECT | GO:0018108~peptidyl-tyrosine phosphorylation                 | 6 | 3.157894737 | 0.006740315 | ENSG000000080824,<br>ENSG00000010219,<br>ENSG000000127334,<br>ENSG000000037280,<br>ENSG000000183317,<br>ENSG000000070759  | 130 | 154 | 16787 | 5.031068931 | 0.9907218  | 0.9907218 | 9.68216959 |

---
